# Supplementary material for: Molecular Insights into Human Transmembrane Protease Serine-2 (TMPS2) Inhibitors against SARS-CoV2: Homology Modelling, Molecular Dynamics, and Docking Studies
Source: PubMed Central journal article supplement (PMC7663346; doi:10.3390/molecules25215007), 2020-10-29
Supplement: molecules-25-05007-s001.pdf [file molecules-25-05007-s001.pdf]

## Supplementary materials

**Table S1.** Stereochemical quality assessment of TMPS2 model 1 (5CE1\_A template).

|                         |                             |              |        |                                |
|-------------------------|-----------------------------|--------------|--------|--------------------------------|
| Protein Geometry        | Poor rotamers               | 3            | 1.02%  | Goal: <0.3%                    |
|                         | Favoured rotamers           | 278          | 94.24% | Goal: >98%                     |
|                         | Ramachandran outliers       | 3            | 0.87%  | Goal: <0.05%                   |
|                         | Ramachandran favoured       | 317          | 92.15% | Goal: >98%                     |
|                         | Rama distribution Z-score   | -1.49 ± 0.44 |        | Goal: abs(Z score) < 2         |
|                         | C $\beta$ deviations >0.25Å | 6            | 1.89%  | Goal: 0                        |
|                         | Bad bonds:                  | 0 / 2779     | 0.00%  | Goal: 0%                       |
|                         | Bad angles:                 | 31 / 3779    | 0.82%  | Goal: <0.1%                    |
| Peptide Omegas          | Cis Prolines:               | 0 / 16       | 0.00%  | Expected: ≤1 per chain, or ≤5% |
| Low-resolution Criteria | CaBLAM outliers             | 7            | 2.0%   | Goal: <1.0%                    |
|                         | CA Geometry outliers        | 4            | 1.17%  | Goal: <0.5%                    |

**Table S2.** Stereochemical quality assessment of TMPS2 model 2 (1Z8G\_A template).

|                         |                             |              |        |                                             |
|-------------------------|-----------------------------|--------------|--------|---------------------------------------------|
| Protein Geometry        | Poor rotamers               | 4            | 1.36%  | Goal: <0.3%                                 |
|                         | Favoured rotamers           | 283          | 96.26% | Goal: >98%                                  |
|                         | Ramachandran outliers       | 3            | 0.87%  | Goal: <0.05%                                |
|                         | Ramachandran favoured       | 323          | 94.17% | Goal: >98%                                  |
|                         | Rama distribution Z-score   | -1.31 ± 0.44 |        | Goal: abs(Z score) < 2                      |
|                         | C $\beta$ deviations >0.25Å | 2            | 0.63%  | Goal: 0                                     |
|                         | Bad bonds:                  | 2 / 2771     | 0.07%  | Goal: 0%                                    |
|                         | Bad angles:                 | 22 / 3768    | 0.58%  | Goal: <0.1%                                 |
| Peptide Omegas          | Cis Prolines:               | 0 / 16       | 0.00%  | Expected: $\leq 1$ per chain, or $\leq 5\%$ |
| Low-resolution Criteria | CaBLAM outliers             | 8            | 2.3%   | Goal: <1.0%                                 |
|                         | CA Geometry outliers        | 5            | 1.47%  | Goal: <0.5%                                 |

**Table S3. Comparison between TMPS2 and the template 5CE1\_A**

| Secondary structures | Template 5CE1_A                                                                                                                                                                                                                                                                                                                                                                                                 |                             | TMPS2 model                                                                                                                                                                                                                                                                                                                                                                                                                                     |                             |
|----------------------|-----------------------------------------------------------------------------------------------------------------------------------------------------------------------------------------------------------------------------------------------------------------------------------------------------------------------------------------------------------------------------------------------------------------|-----------------------------|-------------------------------------------------------------------------------------------------------------------------------------------------------------------------------------------------------------------------------------------------------------------------------------------------------------------------------------------------------------------------------------------------------------------------------------------------|-----------------------------|
|                      | Residues                                                                                                                                                                                                                                                                                                                                                                                                        | Total                       | Residues                                                                                                                                                                                                                                                                                                                                                                                                                                        | Total                       |
| <b>Helices</b>       | Ala38-Met48<br>Ala157-Cys159<br>Leu167-Ser168<br>Gln274-Cys277<br>Val348-Thr361                                                                                                                                                                                                                                                                                                                                 | 34 amino acids<br>(9.14%)   | Lys83-Met109<br>Glu178-Tyr103<br>Arg182-Asp187<br>Asp220- Lys224<br>Ala295-Cys297<br>Thr407-Cys410<br>Val477-Ala490                                                                                                                                                                                                                                                                                                                             | 62 amino acids<br>(12.60%)  |
| <b>Sheets</b>        | Val9-Ser12<br>Arg17-Asp22<br>Trp28-Cys32<br>Leu54-Val61<br>Ser70-Val75<br>Gln84-Asp94<br>Phe100-Cys105<br>Arg122-Asp123<br>Gln132-Tyr137<br>Ala140-Ser149<br>Trp152-Thr155<br>Arg169-Ala178<br>Leu185-Tyr194<br>Ala214-Leu218<br>Ile245-Gly250<br>Gln265-Val269<br>Ile271-Ile272<br>Met291-Ala294<br>Pro311-Glu315<br>Trp324-Trp332<br>Gly343-Lys347                                                            | 129 amino acids<br>(34.68%) | Val149-Tyr152<br>Ile157-Ser162<br>Trp168-His169<br>Lys195-Val201<br>Phe209-Asn213<br>Leu225-Tyr226<br>Val236-Cys241<br>Ile256-Val257<br>Glu260-Ser261<br>Gln270-Val275<br>Val278-Ile286<br>Trp290-Thr293<br>Trp308-Arg316<br>Gly325-Ser333<br>Ala347-Leu351<br>Leu378-Gly383<br>Asn398-Ile405<br>Met424-Ala427<br>Pro444-Lys449<br>Ile452-Ser460<br>Gly472-Asn476                                                                               | 116 amino acids<br>(23.58%) |
| <b>Loops</b>         | Ser1-Pro8<br>Ser13-Ala16<br>Lys23-Thr27<br>Ser33-Gln37<br>Gly45-Ala53<br>Arg62-Thr69<br>Asp76-Thr83<br>Cys95-Arg99<br>Gln106-Gly121<br>Thr124-Trp131<br>Asp138-Gly139<br>Gly150-Asp151<br>Ala156<br>Phe160-Val166<br>Gln179-Gly184<br>His195-Ile213<br>Ser219-Lys244<br>Trp251-Leu264<br>Pro270<br>Ser273<br>Asn278-Lys290<br>Gly295-Gly300<br>Ile301-Gly310<br>Asp316-Arg323<br>Gly333-Pro342<br>His362-Leu372 | 209 amino acids<br>(56.18%) | Met1-Lys82<br>Gly110-Cys148<br>Gly153-Phe156<br>Ser163-Ser167<br>Pro170-Asn177<br>Gly181<br>Met188-Phe194<br>Asp202-Ser208<br>Thr214-Val219<br>His227-Ala235<br>Ile242-Arg255<br>Gly258-Gly259<br>Ala262-Trp269<br>Gln276-Asn277<br>Thr287-Glu289<br>Ala294<br>Val298-His307<br>Gln317-Ala324<br>His334-Ile346<br>Gln352-Gln377<br>Trp385-Leu397<br>Glu406<br>Asn411-Ala423<br>Gly428-Gly443<br>Asn450-Asn451<br>Trp461-Pro471<br>Asp491-Gly492 | 314 amino acids<br>(63.82%) |

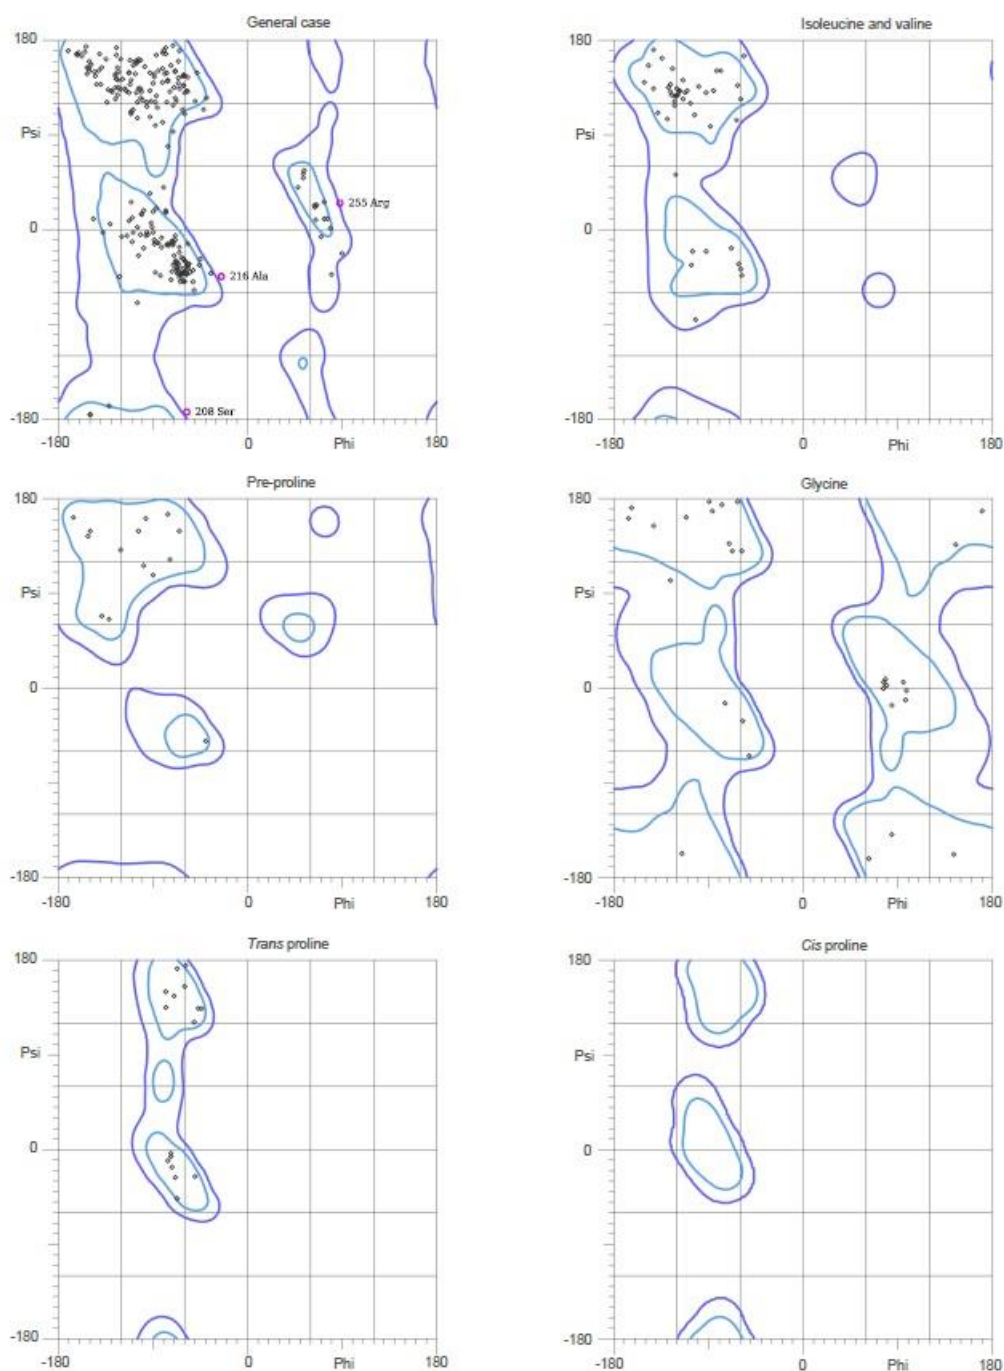

**Figure S1.** Ramachandran plot for TMPS2 model 1 (5CE1\_A template); 92.2% (317/344) of all residues were in favoured (98%) regions, 99.1% (341/344) of all residues were in allowed (>99.8%) regions. There were 3 outliers (phi, psi): 208 Ser (-58.3, -174.6), 216 Ala (-25.8, -45.7) and 255 Arg (88.3, 25.7).

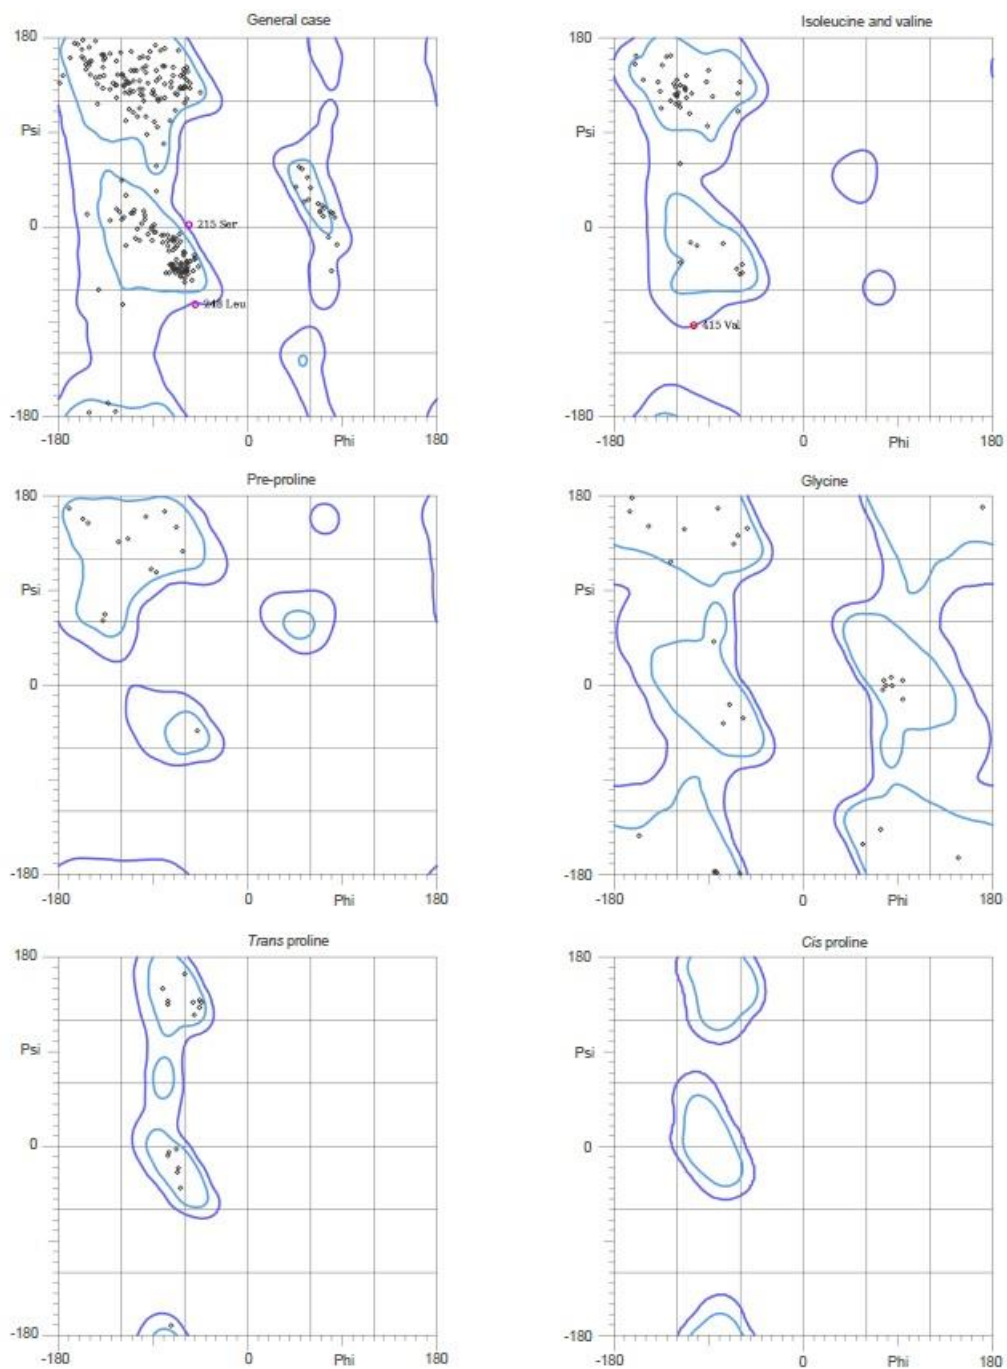

**Figure S2.** Ramachandran plot for TMPS2 model 2 (1Z8G\_A template); 94.2% (323/343) of all residues were in favoured (98%) regions, 99.1% (340/343) of all residues were in allowed (>99.8%) regions. There were 3 outliers (phi, psi): 215 Ser (-56.0, 2.4), 248 Leu (-50.9, -74.7) and 415 Val (-104.8, -94.8).

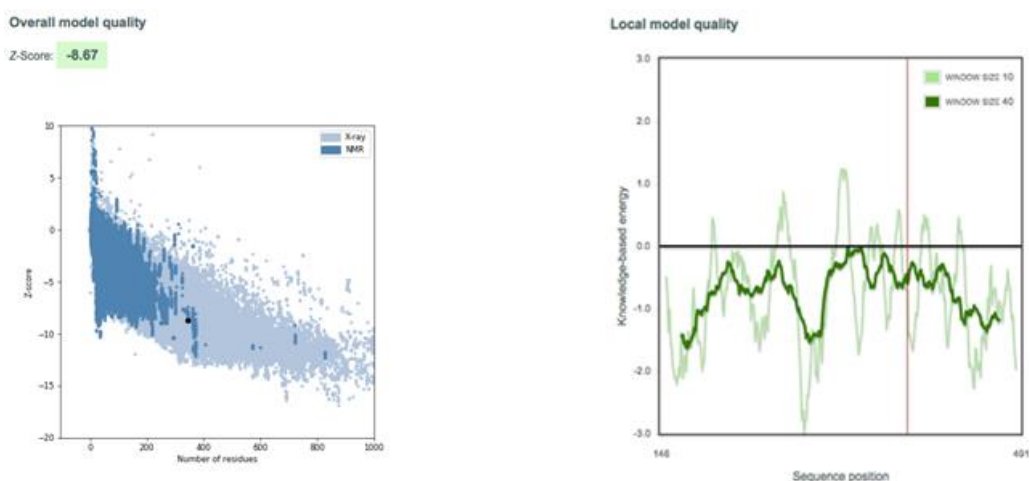

**Figure S3.** Z-scores of TMPS2 model 1 (5CE1\_A template) determined by X-ray crystallography (light blue) or NMR spectroscopy (dark blue), and local model quality by plotting energies as a function of amino acid sequence position, a positive value indicates erroneous parts; most of the amino acids gave negative values.

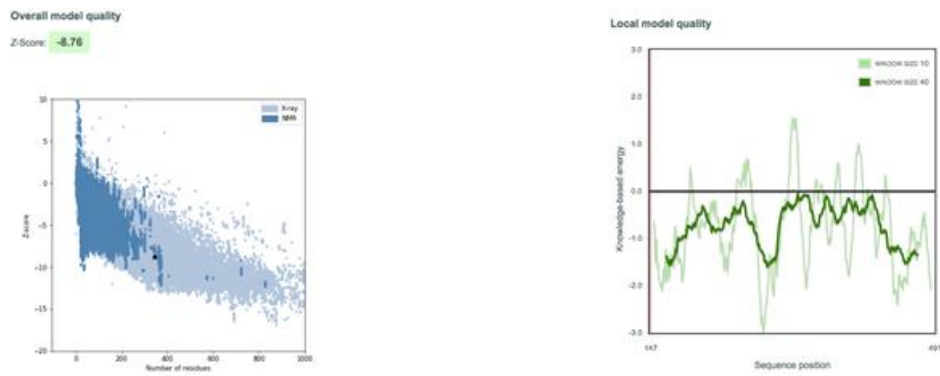

**Figure S4.** Z-scores of TMPS2 model 2 (1Z8G\_A template) determined by X-ray crystallography (light blue) or NMR spectroscopy (dark blue), and local model quality by plotting energies as a function of amino acid sequence position, a positive value indicates erroneous parts; most of the amino acids gave negative values.

Completed at 6:19 am | [View Structure](#)

95.38% of the residues have  
averaged 3D-1D score  $\geq 0.2$

**Pass**

At least 80% of the amino acids have scored  $\geq 0.2$  in the 3D/1D profile.

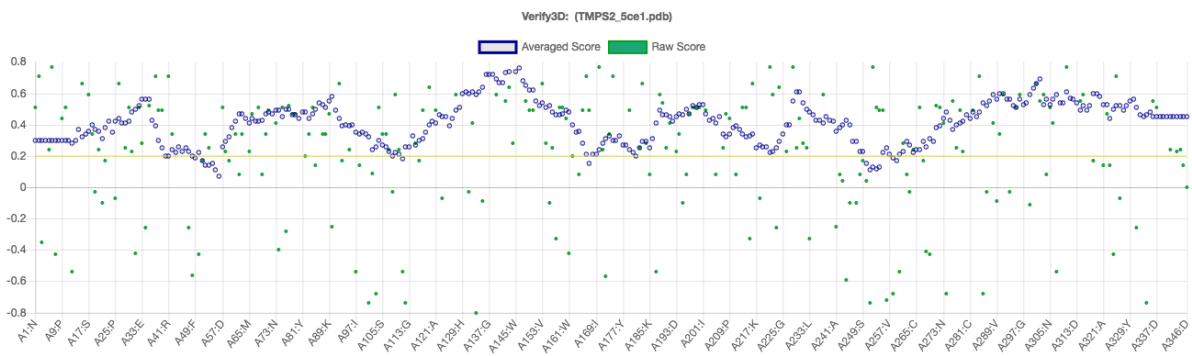

**Figure S5.** Verify 3D results for model 1 (5CE1\_A template) showing that the model passes in the 3D/1D profile.



Completed at 6:23 am | View Structure

91.59% of the residues have  
averaged 3D-1D score  $\geq 0.2$

**Pass**

At least 80% of the amino acids have scored  $\geq 0.2$  in the 3D/1D profile.

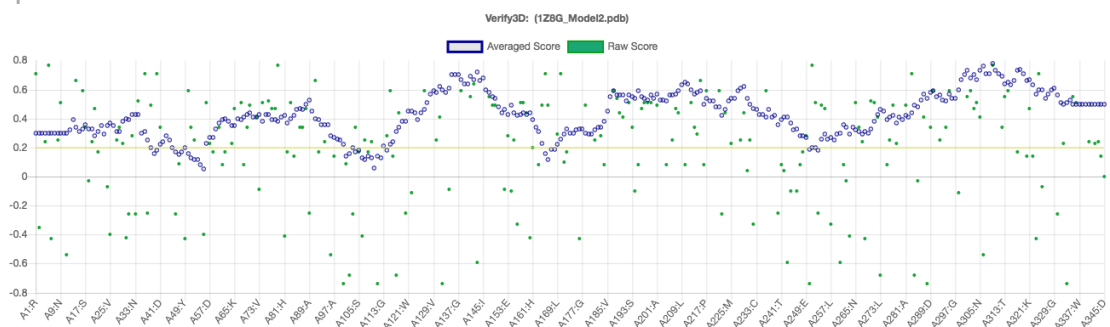

**Figure S6.** Verify 3D results for model 2 (1Z8G\_A template) showing that the model passes in the 3D/1D profile.

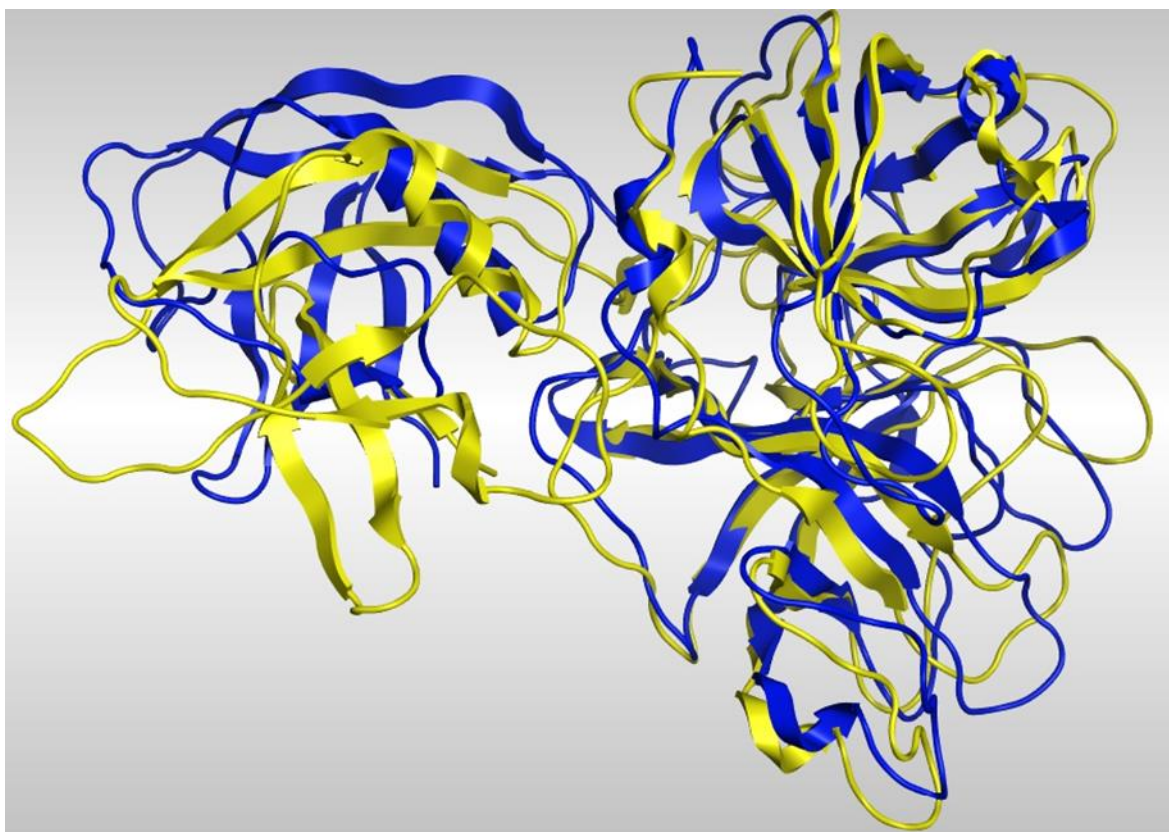

**Figure S7.** Overlap of 5CE1\_A (blue) and 1Z8G\_A (yellow) after MD simulation.



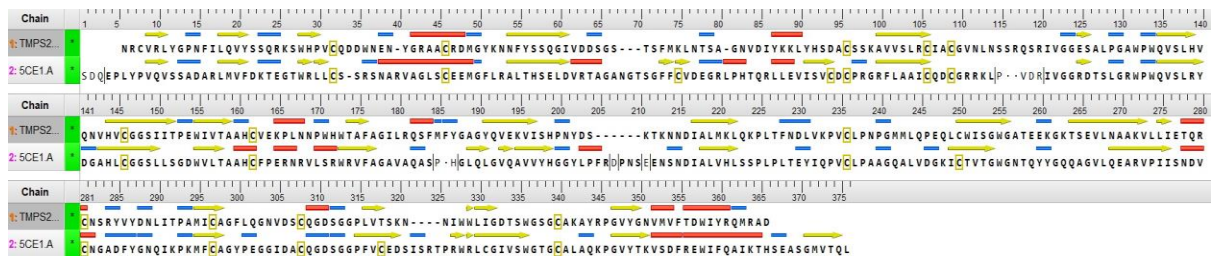

**Figure S9.** Comparison between the secondary structure of TMPS2 and the template 5CE1\_A after alignment and superimposition using MOE software, showing  $\alpha$ -helices as red lines,  $\beta$ -sheets as yellow arrows and loops as blue lines.

**A**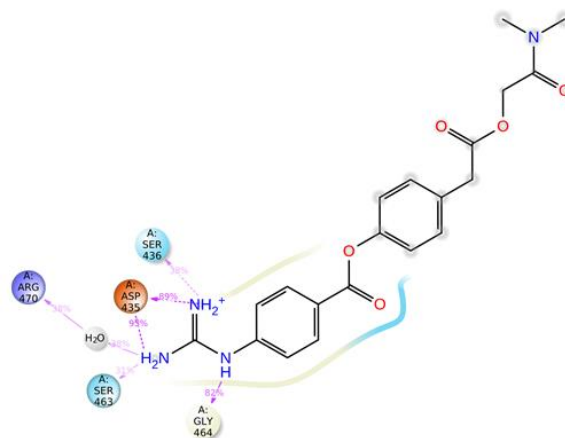**B**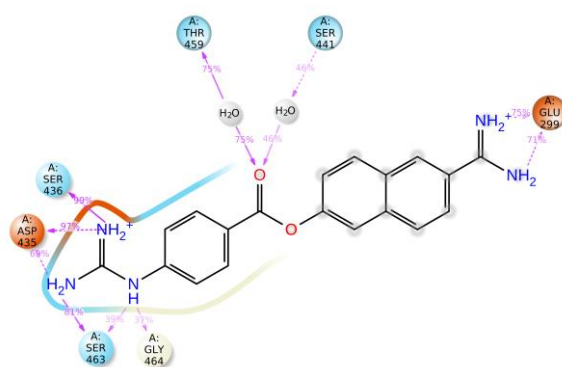**C**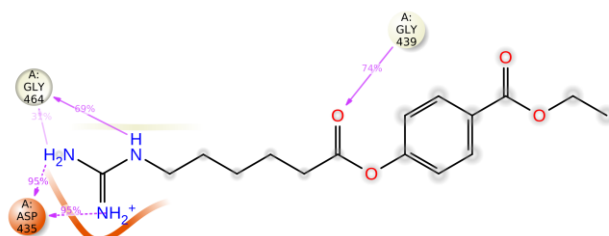**D**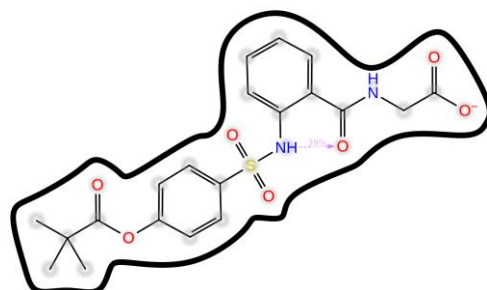

**Figure S10.** A schematic of detailed ligand atom interactions of (A) camostat, (B) nafamostat, (c) gabexate and (D) sivelestat with the protein residues of TMPS2 protein. Interactions that occur more than 30.0% of the simulation time in the selected trajectory (0 through 200 ns) are shown.

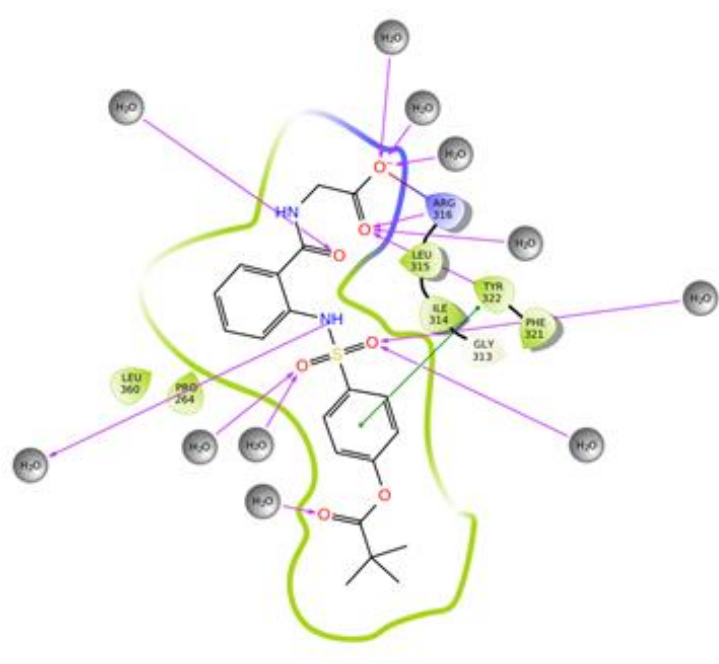

**Figure S11.** 2D Ligand interactions of sivelestat in TMPS2 protein.
